# Supplementary material for: Facile fabrication of hierarchical carbon fiber–MoS2 ultrathin nanosheets and its tribological properties
Source: Royal Society of Chemistry journal article supplement (doi:10.1039/c6ra11419a), 2016-01-01
Supplement: c6ra11419a1.pdf [file c6ra11419a1.pdf]

**Table 1 The friction coefficient and wear rate of EP composites with various contents of CF**

| Materials  | Friction coefficient | Wear rate ( $10^{-4}\text{mm}^3/\text{Nm}$ ) |
|------------|----------------------|----------------------------------------------|
| EP         | 0.57                 | 6.91                                         |
| EP/1wt.%CF | 0.57                 | 6.32                                         |
| EP/3wt.%CF | 0.56                 | 5.90                                         |
| EP/5wt.%CF | 0.54                 | 4.11                                         |
| EP/7wt.%CF | 0.59                 | 5.32                                         |
